# Supplementary material
Source: publisher site journal article supplement (https://www.dovepress.com/article/455183)
Supplement: Supplementary file 1 [file get_supplementary_file.php]

**Table S1. Results of hypothesis testing of concomitant drugs in the model development procedure**

| Model no. | Model description | OFV | ΔOFV | P-value |
| --- | --- | --- | --- | --- |
| Forward inclusion 1 |  |  |  |  |
| 1 | Base model (fixed weight) | 1032.636 |  |  |
| 2 | Add Alprazolam Tablets on CL/F in Model 1 | 1032.271 | -0.365 | NS |
| 3 | Add Amisulpride Tablets on CL/F in Model 1 | 1032.517 | -0.119 | NS |
| 4 | Add Aripiprazole Orally Disintegrating Tablets on CL/F in Model 1 | 1012.991 | -19.645 | *P*<0.01 |
| 5 | Add Benzhexol Hydrochloride Tablets on CL/F in Model 1 | 1027.508 | -5.128 | NS |
| 6 | Add Bezafibrate Tablets on CL/F in Model 1 | 1027.757 | -4.879 | NS |
| 7 | Add Buspirone Hydrochloride Tablets on CL/F in Model 1 | 1031.977 | -0.659 | NS |
| 8 | Add Clonazepam Tablets on CL/F in Model 1 | 1027.474 | -5.162 | NS |
| 9 | Add Clopidogrel Hydrogen Sulphate Tablets on CL/F in Model 1 | 1032.562 | -0.074 | NS |
| 10 | Add Docusate Sodium Tablets on CL/F in Model 1 | 1028.735 | -3.901 | NS |
| 11 | Add Enteric-Coated Aspirin on CL/F in Model 1 | 1032.127 | -0.509 | NS |
| 12 | Add Escitalopram Oxalate Tablets on CL/F in Model 1 | 1032.488 | -0.148 | NS |
| 13 | Add Finasteride Tablets on CL/F in Model 1 | 1029.147 | -3.489 | NS |
| 14 | Add Irbesartan and Hydrochlorothiazide Tablets on CL/F in Model 1 | 1032.201 | -0.435 | NS |
| 15 | Add Lamotrigine Tablets on CL/F in Model 1 | 1032.125 | -0.511 | NS |
| 16 | Add Lorazepam Tablets on CL/F in Model 1 | 1023.74 | -8.896 | *P*<0.01 |
| 17 | Add Metformin Hydrochloride Tablets on CL/F in Model 1 | 1032.635 | -0.001 | NS |
| 18 | Add Metoprolol Tartrate Tablet on CL/F in Model 1 | 1031.816 | -0.82 | NS |
| 19 | Add Nimodipine Tablets on CL/F in Model 1 | 1032.628 | -0.008 | NS |
| 20 | Add Omeprazole Enteric-Coated Capsules on CL/F in Model 1 | 1023.777 | -8.859 | *P*<0.01 |
| 21 | Add Paliperidone Sustained-Release Tablets on CL/F in Model 1 | 1032.34 | -0.296 | NS |
| 22 | Add Perospirone Hydrochloride Tablets on CL/F in Model 1 | 1030.103 | -2.533 | NS |
| 23 | Add Perphenazine Tablets on CL/F in Model 1 | 1031.002 | -1.634 | NS |
| 24 | Add Propranolol Hydrochloride Tablets on CL/F in Model 1 | 1028.79 | -3.846 | NS |
| 25 | Add Pyrazinamide Tablets on CL/F in Model 1 | 1032.178 | -0.458 | NS |
| 26 | Add Risperidone Tablets on CL/F in Model 1 | 1032.446 | -0.19 | NS |
| 27 | Add Sertraline Hydrochloride Tablets on CL/F in Model 1 | 1032.472 | -0.164 | NS |
| 28 | Add Valsartan Capsule on CL/F in Model 1 | 1032.567 | -0.069 | NS |
| 29 | Add Zaleplon Dispersion Tablets on CL/F in Model 1 | 1029.604 | -3.032 | NS |
| 30 | Add Ziprasidone Hydrochloride Capsules on CL/F in Model 1 | 1031.878 | -0.758 | NS |
| 31 | Add Zopiclone Tablets on CL/F in Model 1 | 1031.967 | -0.669 | NS |
| Forward inclusion 2 |  |  |  |  |
| 32 | Add Lorazepam Tablets on CL/F in Model 4 | 1006.416 | -6.575 | NS |
| 33 | Add Omeprazole Enteric-Coated Capsules on CL/F in Model 4 | 1004.511 | -8.48 | *P*<0.01 |
| Backward elimination |  |  |  |  |
| 34 | Remove Aripiprazole Orally Disintegrating Tablets on CL/F from Model 33 | 1023.777 | 19.266 | *P*<0.001 |
| 35 | Remove Omeprazole Enteric-Coated Capsules on CL/F from Model 33 | 1012.991 | 8.48 | NS |

NS, Not Significant.
